# Supplementary material
Source: HighWire-hosted journal article supplement (https://www.genetics.org/content/suppl/2015/05/12/genetics.115.176495)
Supplement: TableS1.pdf [file TableS1.pdf]

Table S1. Yeast strains used to obtain the data shown in the Figures S1 to S6.

| Strain  | Genotype                                                                                                           | Reference                      |
|---------|--------------------------------------------------------------------------------------------------------------------|--------------------------------|
| GFY-140 | BY4741; <i>cdc10Δ::Hyg<sup>R</sup></i> + <i>pJT2022</i>                                                            | This study                     |
| GFY-87  | BY4741; <i>cdc10Δ::Kan<sup>R</sup> shs1Δ::SHS1::eGFP::Nat<sup>R</sup></i> + <i>pJT2022</i>                         | This study                     |
| GFY-137 | BY4741; <i>cdc10Δ::Kan<sup>R</sup> shs1Δ::Hyg<sup>R</sup></i> + <i>pJT2022</i>                                     | This study                     |
| BY4741  | <i>MATa leu2Δ ura3Δ met15Δ his3Δ</i>                                                                               | (BRACHMANN <i>et al.</i> 1998) |
| GFY-568 | BY4741; <i>cdc11Δ::CDC11::Hyg<sup>R</sup></i> + <i>pJT1520</i>                                                     | This study                     |
| GFY-58  | BY4741; <i>cdc11Δ::CDC11::mCherry::SpHIS5</i> + <i>pJT1520</i>                                                     | This study                     |
| GFY-153 | BY4741; <i>cdc11Δ::Kan<sup>R</sup></i> + <i>pJT1520</i>                                                            | This study                     |
| GFY-310 | BY4741; <i>cdc10Δ::Kan<sup>R</sup> shs1Δ::shs1(S221D)::eGFP::Nat<sup>R</sup></i> + <i>pJT2022</i>                  | This study                     |
| GFY-188 | BY4741; <i>cdc10Δ::Kan<sup>R</sup> shs1Δ::shs1(S221A)::eGFP::Nat<sup>R</sup></i> + <i>pJT2022</i>                  | This study                     |
| GFY-293 | BY4741; <i>cdc11Δ::cdc11(Δ357-415)::mCherry::SpHIS5 shs1Δ::SHS1::eGFP::Nat<sup>R</sup></i> + <i>pJT1520</i>        | This study                     |
| GFY-166 | BY4741; <i>cdc11Δ::cdc11(Δ357-415)::mCherry::SpHIS5 shs1Δ::Hyg<sup>R</sup></i> + <i>pJT1520</i>                    | This study                     |
| GFY-292 | BY4741; <i>cdc11Δ::cdc11(Δ357-415)::mCherry::SpHIS5 shs1Δ::shs1(S221D)::eGFP::Nat<sup>R</sup></i> + <i>pJT1520</i> | This study                     |
| GFY-294 | BY4741; <i>cdc11Δ::cdc11(Δ357-415)::mCherry::SpHIS5 shs1Δ::shs1(S221A)::eGFP::Nat<sup>R</sup></i> + <i>pJT1520</i> | This study                     |
| GFY-302 | BY4741; <i>cdc12Δ::cdc12(K391N Δ392-407)::Hyg<sup>R</sup> shs1Δ::SHS1::eGFP::Nat<sup>R</sup></i> + <i>pJT1622</i>  | This study                     |

|                      |                                                                                                                                                                                                                                     |            |
|----------------------|-------------------------------------------------------------------------------------------------------------------------------------------------------------------------------------------------------------------------------------|------------|
| GFY-139              | BY4741; <i>cdc12Δ::cdc12(K391N Δ392-407)::Hyg<sup>R</sup></i><br><i>shs1Δ::Kan<sup>R</sup> + pJT1622</i>                                                                                                                            | This study |
| GFY-297 <sup>i</sup> | BY4741; <i>cdc12Δ::cdc12(K391N Δ392-407)::Hyg<sup>R</sup></i><br><i>shs1Δ::shs1(S221D)::eGFP::Nat<sup>R</sup> + pJT1622</i>                                                                                                         | This study |
| GFY-298              | BY4741; <i>cdc12Δ::cdc12(K391N Δ392-407)::Hyg<sup>R</sup></i><br><i>shs1Δ::shs1(S221A)::eGFP::Nat<sup>R</sup> + pJT1622</i>                                                                                                         | This study |
| GFY-160              | BY4741; <i>cdc11Δ::CDC11::mCherry::SpHIS5<sup>R</sup></i><br><i>shs1Δ::SHS1::eGFP::Nat<sup>R</sup> + pJT1520</i>                                                                                                                    | This study |
| GFY-147              | BY4741; <i>cdc11Δ::Kan<sup>R</sup> shs1Δ::SHS1::eGFP::Nat<sup>R</sup> +</i><br><i>pJT1520</i>                                                                                                                                       | This study |
| GFY-163              | BY4741; <i>cdc11Δ::Kan<sup>R</sup> shs1Δ::Hyg<sup>R</sup> + pJT1520</i>                                                                                                                                                             | This study |
| GFY-923              | BY4741; <i>cdc11Δ::Kan<sup>R</sup> shs1Δ::shs1(S221A)::eGFP::Nat<sup>R</sup> +</i><br><i>pJT1520</i>                                                                                                                                | This study |
| GFY-951              | BY4741; <i>cdc11Δ::Kan<sup>R</sup> shs1Δ::shs1(S221D)::eGFP::Nat<sup>R</sup> +</i><br><i>pJT1520</i>                                                                                                                                | This study |
| YFR-387              | BY4742; <i>hof1Δ::Kan<sup>R</sup> + pJT4836</i>                                                                                                                                                                                     | This study |
| GFY-934              | BY4742; <i>hof1Δ::Kan<sup>R</sup> shs1Δ::Hyg<sup>R</sup> + pJT4836</i>                                                                                                                                                              | This study |
| GFY-971              | BY4741; <i>hof1Δ::Kan<sup>R</sup> shs1Δ::SHS1::eGFP::Nat<sup>R</sup> + pJT4836</i>                                                                                                                                                  | This study |
| GFY-978              | BY4741; <i>hof1Δ::Kan<sup>R</sup> shs1Δ::shs1(Δ349-551)::eGFP::Nat<sup>R</sup> +</i><br><i>pJT4836</i>                                                                                                                              | This study |
| GFY-966              | BY4741; <i>hof1Δ::Kan<sup>R</sup> shs1Δ::shs1(S350A T351A T386A</i><br><i>S416A S441A S447A T454A S460A T462A S519A S520A</i><br><i>S521A S522A S525A S529A S530A T539A T541A</i><br><i>S545A)::eGFP::Nat<sup>R</sup> + pJT4836</i> | This study |
| GFY-42               | BY4741; <i>cdc10Δ::CDC10::mCherry::SpHIS5</i>                                                                                                                                                                                       | This study |

|          |                                                                                                                          |            |
|----------|--------------------------------------------------------------------------------------------------------------------------|------------|
| GFY-395  | BY4741; <i>cdc10Δ::cdc10(H24A R25A K28A K29A)::mCherry::SpHIS5</i>                                                       | This study |
| GFY-164  | BY4741; <i>cdc11Δ::CDC11::mCherry::SpHIS5<sup>R</sup> shs1Δ::Hyg<sup>R</sup> + pJT1520</i>                               | This study |
| GFY-1024 | BY4741; <i>cdc11Δ::cdc11(Δ2-18 R19A)::mCherry::SpHIS5 + pJT1520</i>                                                      | This study |
| GFY-1062 | BY4741; <i>cdc11Δ::cdc11(Δ2-18 R19A)::mCherry::SpHIS5 shs1Δ::Hyg<sup>R</sup> + pJT1520</i>                               | This study |
| GFY-1061 | BY4741; <i>cdc11Δ::cdc11(Δ2-18 R19A)::mCherry::SpHIS5 shs1Δ::shs1(Δ2-18Δ K19A R20A)::eGFP::Nat<sup>R</sup> + pJT1520</i> | This study |
| GFY-1022 | BY4741; <i>cdc11Δ::Kan<sup>R</sup> shs1Δ::shs1(Δ2-18 K19A R20A)::eGFP::Nat<sup>R</sup> + pJT1520</i>                     | This study |
| GFY-93   | BY4741; <i>cdc10Δ::Kan<sup>R</sup> shs1Δ::shs1(Δ2-18)::eGFP::Nat<sup>R</sup> + pJT2022</i>                               | This study |
| GFY-249  | BY4741; <i>cdc10Δ::Kan<sup>R</sup> shs1Δ::shs1(R13A R14A K15A K16A K19A R20A)::eGFP::Nat<sup>R</sup> + pJT2022</i>       | This study |
| GFY-1021 | BY4741; <i>cdc10Δ::Kan<sup>R</sup> shs1Δ::shs1(Δ2-18Δ K19A R20A)::eGFP::Nat<sup>R</sup> + pJT2022</i>                    | This study |
| GFY-161  | BY4741; <i>cdc11Δ::cdc11(Δ2-1Δ)::mCherry::SpHIS5<sup>R</sup> shs1Δ::shs1(Δ2-18)::eGFP::Nat<sup>R</sup> + pJT1520</i>     | This study |
| GFY-162  | BY4741; <i>cdc11Δ::cdc11(Δ357-415)::mCherry::SpHIS5 shs1Δ::shs1(Δ349-551)::eGFP::Nat<sup>R</sup> + pJT1520</i>           | This study |
| GFY-532  | BY4741; <i>cdc11Δ::CDC11::Hyg<sup>R</sup> shs1Δ::SHS1::eGFP::Nat<sup>R</sup> + pJT1520</i>                               | This study |
| GFY-533  | BY4741; <i>cdc11Δ::cdc11(Δ2-18)::Hyg<sup>R</sup> shs1Δ::shs1(Δ2-</i>                                                     | This study |

|         |                                                                                                                                                      |            |
|---------|------------------------------------------------------------------------------------------------------------------------------------------------------|------------|
|         | 18)::eGFP::Nat <sup>R</sup> + pJT1520                                                                                                                |            |
| GFY-534 | BY4741; <i>cdc11Δ::cdc11(Δ357-415)::Hyg<sup>R</sup></i><br><i>shs1Δ::shs1(Δ349-551)::eGFP::Nat<sup>R</sup> + pJT1520</i>                             | This study |
| GFY-724 | BY4741; <i>cdc11Δ::CDC11::Hyg<sup>R</sup> shs1Δ::Kan<sup>R</sup> + pJT1520</i>                                                                       | This study |
| GFY-725 | BY4741; <i>cdc11Δ::cdc11(Δ2-18)::Hyg<sup>R</sup> shs1Δ::Kan<sup>R</sup> +</i><br><i>pJT1520</i>                                                      | This study |
| GFY-726 | BY4741; <i>cdc11Δ::cdc11(Δ357-415)::Hyg<sup>R</sup> shs1Δ::Kan<sup>R</sup> +</i><br><i>pJT1520</i>                                                   | This study |
| GFY-681 | BY4741; <i>cdc11Δ::cdc11(G29D)::SpHIS5 + pJT1520</i>                                                                                                 | This study |
| GFY-694 | BY4741; <i>cdc11Δ::cdc11(Δ2-18 G29D)::SpHIS5 + pJT1520</i>                                                                                           | This study |
| GFY-675 | BY4741; <i>cdc11Δ::cdc11(G29D Δ357-415)::SpHIS5 +</i><br><i>pJT1520</i>                                                                              | This study |
| GFY-94  | BY4741; <i>cdc10Δ::Kan<sup>R</sup> shs1Δ::shs1(Δ349-551)::eGFP::Nat<sup>R</sup></i><br><i>+ pJT2022</i>                                              | This study |
| GFY-644 | BY4741; <i>cdc10Δ::Kan<sup>R</sup> shs1Δ::Sc_shs1(1-</i><br><i>339)::Ag_shs1(336-580)::eGFP::Nat<sup>R</sup> + pJT2022</i>                           | This study |
| GFY-655 | BY4741; <i>cdc10Δ::Kan<sup>R</sup> shs1Δ::Ag_shs1(1-</i><br><i>335)::Sc_shs1(340-551)::eGFP::Nat<sup>R</sup> + pJT2022</i>                           | This study |
| GFY-643 | BY4741; <i>cdc10Δ::Kan<sup>R</sup> shs1Δ::Ag_shs1(1-580)::eGFP::Nat<sup>R</sup></i><br><i>+ pJT2022</i>                                              | This study |
| GFY-615 | BY4741; <i>cdc11Δ::cdc11(Δ357-415)::mCherry::SpHIS5</i><br><i>shs1Δ::Sc_shs1(1-339)::Ag_shs1(336-580)::eGFP::Nat<sup>R</sup> +</i><br><i>pJT1520</i> | This study |
| GFY-571 | BY4741; <i>cdc11Δ::cdc11(Δ357-415)::mCherry::SpHIS5</i><br><i>shs1Δ::Ag_shs1(1-335)::Sc_shs1(340-551)::eGFP::Nat<sup>R</sup> +</i>                   | This study |

*pJT1520*

|         |                                                                                                                            |            |
|---------|----------------------------------------------------------------------------------------------------------------------------|------------|
| GFY-614 | BY4741; <i>cdc11Δ::cdc11(Δ357-415)::mCherry::SpHIS5</i><br><i>shs1Δ::Ag_shs1(1-580)::eGFP::Nat<sup>R</sup> + pJT1520</i>   | This study |
| GFY-149 | BY4741; <i>cdc11Δ::Kan<sup>R</sup> shs1Δ::shs1(Δ349-551)::eGFP::Nat<sup>R</sup></i><br><i>+ pJT1520</i>                    | This study |
| GFY-639 | BY4741; <i>cdc11Δ::Kan<sup>R</sup> shs1Δ::Sc_shs1(1-</i><br><i>339)::Ag_shs1(336-580)::eGFP::Nat<sup>R</sup> + pJT1520</i> | This study |
| GFY-637 | BY4741; <i>cdc11Δ::Kan<sup>R</sup> shs1Δ::Ag_shs1(1-</i><br><i>335)::Sc_shs1(340-551)::eGFP::Nat<sup>R</sup> + pJT1520</i> | This study |
| GFY-683 | BY4741; <i>cdc11Δ::Kan<sup>R</sup> shs1Δ::Ag_shs1(1-580)::eGFP::Nat<sup>R</sup></i><br><i>+ pJT1520</i>                    | This study |

---
